# Supplementary material for: Nest architecture and colony composition in two populations of Ectatomma ruidum sp. 2 (E. ruidum species complex) in southwestern Colombia
Source: PLOS journal article supplement (doi:10.1371/journal.pone.0263382), 2022-02-02

**Figure S1. Relationship between different categories of nest population for the 152 complete nests of *E. ruidum* sp. 2. extracted.** (A) between the total number of workers per nest and the total number of larvae ( $R_{(152)} = 0.6976$ ,  $p < 0.001$ ) or (B) the total number of pupae ( $R_{(152)} = 0.6050$ ,  $p < 0.001$ ) and (C) between both categories of brood ( $R_{(152)} = 0.7252$ ,  $p < 0.001$ ).

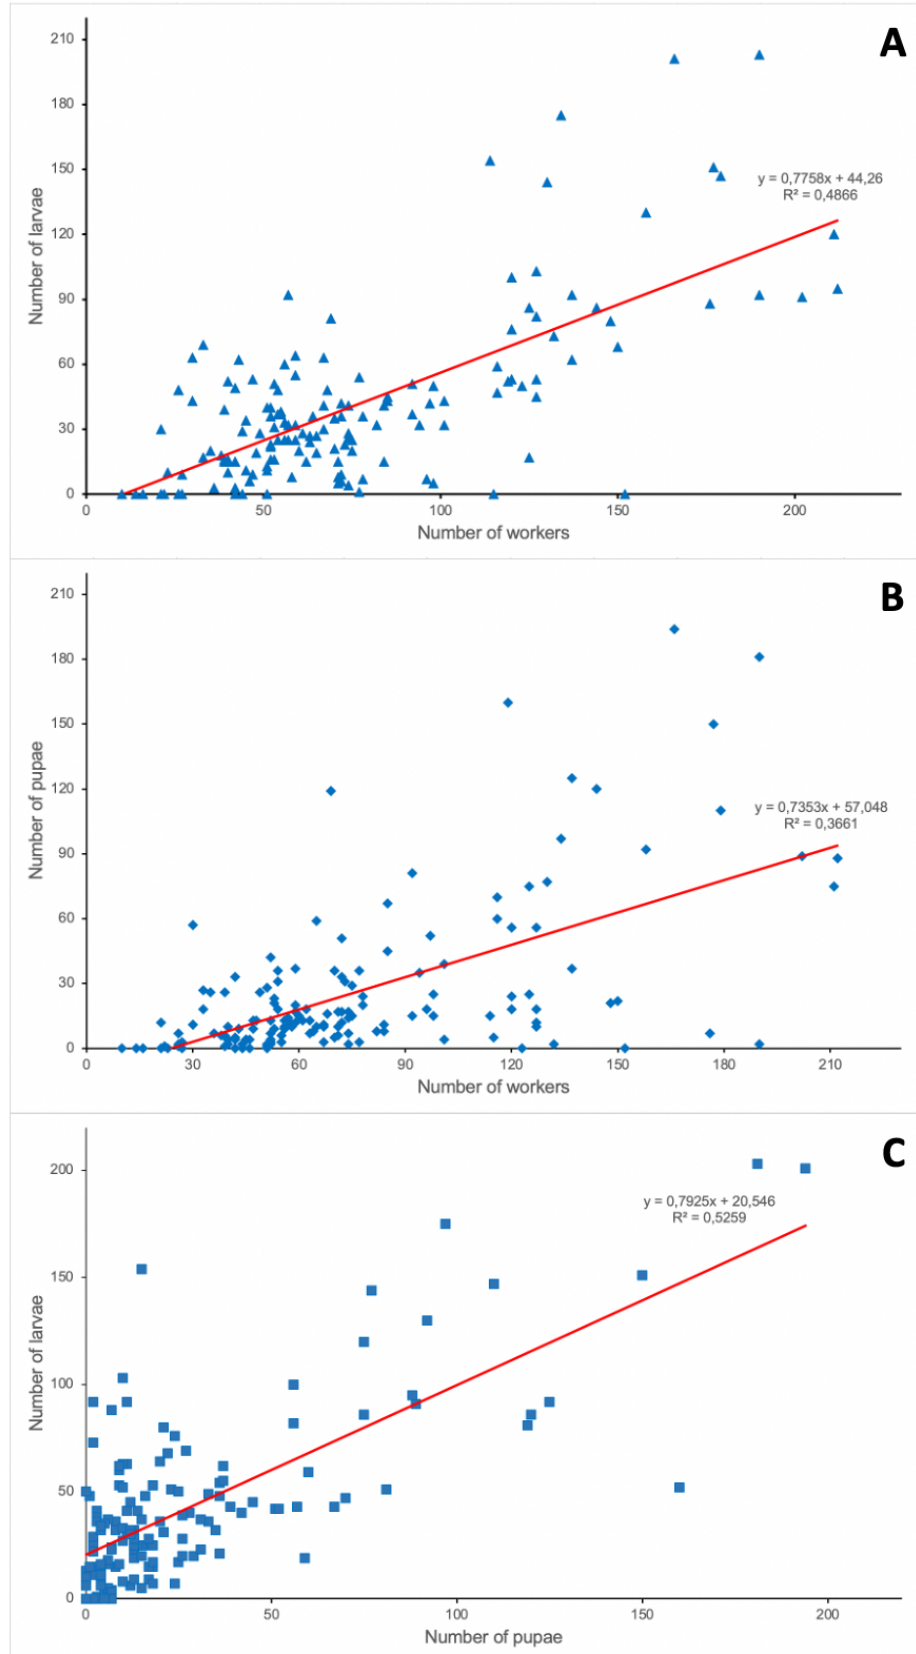

Supplement: S4 (10.1371/journal.pone.0263382.s004) [file journal.pone.0263382.s004]
